# Supplementary material
Source: PubMed Central journal article supplement (PMC3836216)
Supplement: NIHMS527528-supplement-Supp_1.pdf [file NIHMS527528-supplement-Supp_1.pdf]

**Supplementary Table 1: Effect of ectopic C/EBP $\alpha$  on fold-induction of androgen target genes in LNCaP cells following a 6h treatment with R1881 (A value of 1 indicates no effect).**

| Probe Set ID | Entrez Gene | Gene Symbol | Fold change |
|--------------|-------------|-------------|-------------|
| 1554163_at   | 117581      | TWIST2      | 0.0769      |
| 1562048_at   | 152225      | LOC152225   | 0.1         |
| 222168_at    |             |             | 0.29        |
| 210504_at    | 10661       | KLF1        | 0.3         |
| 215957_at    | 7321        | UBE2D1      | 0.311       |
| 1569111_at   | 9580        | SOX13       | 0.362       |
| 237377_at    |             |             | 0.366       |
| 239449_at    |             |             | 0.406       |
| 1563571_at   | 285463      | LOC285463   | 0.425       |
| 1570433_at   | 7113        | TMPRSS2     | 0.427       |
| 215595_x_at  |             |             | 0.438       |
| 212448_at    | 23327       | NEDD4L      | 0.444       |
| 244697_at    |             |             | 0.444       |
| 1553153_at   | 245972      | ATP6V0D2    | 0.453       |
| 1563899_at   | 197021      | LCTL        | 0.4644      |
| 243929_at    |             |             | 0.4655      |
| 230267_at    |             |             | 0.49        |
| 244767_at    | 118924      | C10orf4     | 0.499       |
| 1570622_at   |             |             | 0.51        |
| 1562095_at   |             |             | 0.511       |
| 240107_at    |             |             | 0.515       |
| 234440_at    |             |             | 0.516       |
| 232535_at    |             |             | 0.54        |
| 1569761_x_at |             |             | 0.541       |
| 242021_at    |             |             | 0.542       |
| 242474_s_at  | 203547      | LOC203547   | 0.556       |
| 241218_at    |             |             | 0.562       |
| 235592_at    |             |             | 0.582       |
| 233123_at    | 30061       | SLC40A1     | 0.584       |
| 244026_at    |             |             | 0.587       |
| 1553574_at   | 338376      | IFNE1       | 0.59        |
| 209854_s_at  | 3817        | KLK2        | 0.599       |
| 1553313_s_at | 6526        | SLC5A3      | 0.599       |
| 689_at       | 8501        | SLC43A1     | 0.599       |
| 233313_at    |             |             | 0.599       |
| 226446_at    | 55502       | HES6        | 0.619       |

|              |        |           |       |
|--------------|--------|-----------|-------|
| 235690_at    | 84622  | ZNF594    | 0.62  |
| 216783_at    |        |           | 0.62  |
| 244505_at    |        |           | 0.622 |
| 1555737_a_at | 9622   | KLK4      | 0.625 |
| 212976_at    |        |           | 0.63  |
| 241043_at    |        |           | 0.63  |
| 225337_at    | 11057  | ABHD2     | 0.631 |
| 240038_at    |        |           | 0.631 |
| 238499_at    | 85414  | SLC45A3   | 0.632 |
| 1555697_at   | 9622   | KLK4      | 0.635 |
| 1566079_at   | 647190 | LOC647190 | 0.637 |
| 205566_at    | 11057  | ABHD2     | 0.639 |
| 220064_at    | 79809  | TTC21B    | 0.646 |
| 240721_at    |        |           | 0.646 |
| 242199_at    |        |           | 0.652 |
| 214740_at    | 246721 | POLR2J2   | 0.654 |
| 214740_at    | 548644 | POLR2J3   | 0.654 |
| 214740_at    | 84820  | POLR2J4   | 0.654 |
| 1554739_at   | 3652   | IPP       | 0.66  |
| 223690_at    | 4053   | LTBP2     | 0.668 |
| 227826_s_at  |        |           | 0.668 |
| 230782_at    | 653381 | LOC653381 | 0.676 |
| 210339_s_at  | 3817   | KLK2      | 0.677 |
| 220302_at    | 4117   | MAK       | 0.682 |
| 1555039_a_at | 10257  | ABCC4     | 0.686 |
| 1570183_at   | 55030  | FBXO34    | 0.7   |
| 202920_at    | 287    | ANK2      | 0.701 |
| 220898_at    |        |           | 0.708 |
| 1557714_at   | 1487   | CTBP1     | 0.719 |
| 220096_at    | 8635   | RNASET2   | 0.72  |
| 207689_at    | 347853 | TBX10     | 0.723 |
| 205815_at    | 5068   | REG3A     | 0.724 |
| 224062_x_at  | 9622   | KLK4      | 0.725 |
| 226726_at    | 129642 | MBOAT2    | 0.727 |
| 1569490_at   | 64778  | FNDC3B    | 0.727 |
| 240015_at    |        |           | 0.735 |
| 210018_x_at  | 10892  | MALT1     | 0.74  |
| 202237_at    | 4837   | NNMT      | 0.743 |
| 210787_s_at  | 10645  | CAMKK2    | 0.76  |
| 242427_at    | 51322  | WAC       | 0.76  |

|              |        |           |       |
|--------------|--------|-----------|-------|
| 241873_at    |        |           | 0.762 |
| 204583_x_at  | 354    | KLK3      | 0.767 |
| 1554086_at   | 10426  | TUBGCP3   | 0.793 |
| 211689_s_at  | 7113   | TMPRSS2   | 0.794 |
| 210517_s_at  | 9590   | AKAP12    | 0.798 |
| 1558711_at   | 285512 | FAM13A1OS | 0.811 |
| 223092_at    | 56172  | ANKH      | 0.814 |
| 239557_at    |        |           | 0.814 |
| 242692_at    |        |           | 0.815 |
| 228696_at    | 85414  | SLC45A3   | 0.819 |
| 1570631_at   |        |           | 0.819 |
| 1569673_at   |        |           | 0.82  |
| 227762_at    |        |           | 0.82  |
| 208309_s_at  | 10892  | MALT1     | 0.822 |
| 228858_at    |        |           | 0.823 |
| 205773_at    | 22849  | CPEB3     | 0.825 |
| 204582_s_at  | 354    | KLK3      | 0.827 |
| 229554_at    |        |           | 0.827 |
| 205102_at    | 7113   | TMPRSS2   | 0.829 |
| 1568889_at   | 2177   | FANCD2    | 0.83  |
| 228854_at    |        |           | 0.83  |
| 211596_s_at  | 26018  | LRIG1     | 0.84  |
| 207103_at    | 3751   | KCND2     | 0.84  |
| 1552897_a_at | 170850 | KCNG3     | 0.846 |
| 1566437_at   | 283475 | LOC283475 | 0.85  |
| 1563863_x_at | 170082 | MGC17403  | 0.854 |
| 206425_s_at  | 7222   | TRPC3     | 0.86  |
| 201108_s_at  | 7057   | THBS1     | 0.87  |
| 230053_at    |        |           | 0.875 |
| 205883_at    | 7704   | ZBTB16    | 0.878 |
| 212570_at    | 23052  | ENDOD1    | 0.883 |
| 206170_at    | 154    | ADRB2     | 0.884 |
| 1555801_s_at | 151126 | ZNF533    | 0.886 |
| 228987_at    |        |           | 0.889 |
| 1557276_at   |        |           | 0.896 |
| 205121_at    | 6443   | SGCB      | 0.9   |
| 226553_at    | 7113   | TMPRSS2   | 0.907 |
| 225330_at    | 3480   | IGF1R     | 0.912 |
| 201109_s_at  | 7057   | THBS1     | 0.912 |
| 1557309_at   | 163486 | DENND1B   | 0.923 |

|             |        |            |        |
|-------------|--------|------------|--------|
| 243483_at   | 79054  | TRPM8      | 0.928  |
| 231644_at   |        |            | 0.931  |
| 212252_at   | 10645  | CAMKK2     | 0.935  |
| 227755_at   |        |            | 0.959  |
| 239922_at   | 84865  | CCDC142    | 0.96   |
| 204121_at   | 10912  | GADD45G    | 0.965  |
| 205862_at   | 9687   | GREB1      | 0.971  |
| 227725_at   | 55808  | ST6GALNAC1 | 0.973  |
| 211497_x_at | 4824   | NKX3-1     | 0.976  |
| 231192_at   | 23566  | EDG7       | 0.983  |
| 206545_at   | 940    | CD28       | 0.986  |
| 200862_at   | 1718   | DHCR24     | 0.99   |
| 239130_at   |        |            | 0.991  |
| 207135_at   | 3356   | HTR2A      | 0.994  |
| 1568627_at  | 57223  | SMEK2      | 1      |
| 240149_at   |        |            | 1.002  |
| 232252_at   | 92235  | DUSP27     | 1.011  |
| 239202_at   | 5865   | RAB3B      | 1.014  |
| 208306_x_at | 3123   | HLA-DRB1   | 1.017  |
| 220786_s_at | 55089  | SLC38A4    | 1.02   |
| 1558692_at  | 112770 | C1orf85    | 1.02   |
| 242821_at   | 203238 | C9orf93    | 1.022  |
| 227609_at   | 94240  | EPSTI1     | 1.029  |
| 1563474_at  | 254013 | MGC50559   | 1.044  |
| 242358_at   |        |            | 1.057  |
| 222088_s_at | 144195 | SLC2A14    | 1.06   |
| 222088_s_at | 6515   | SLC2A3     | 1.06   |
| 212573_at   | 23052  | ENDOD1     | 1.064  |
| 243762_at   |        |            | 1.093  |
| 215868_x_at |        |            | 1.107  |
| 205925_s_at | 5865   | RAB3B      | 1.116  |
| 226982_at   | 22936  | ELL2       | 1.116  |
| 225571_at   | 3977   | LIFR       | 1.1167 |
| 244368_x_at |        |            | 1.127  |
| 203627_at   | 3480   | IGF1R      | 1.128  |
| 209681_at   | 10560  | SLC19A2    | 1.133  |
| 228260_at   | 1993   | ELAVL2     | 1.136  |
| 204897_at   | 5734   | PTGER4     | 1.15   |
| 220018_at   | 79872  | CBLL1      | 1.152  |
| 222450_at   | 56937  | TMEPAI     | 1.172  |

|             |        |              |       |
|-------------|--------|--------------|-------|
| 219555_s_at | 55839  | CENPN        | 1.187 |
| 219856_at   | 79098  | C1orf116     | 1.21  |
| 221245_s_at | 7855   | FZD5         | 1.213 |
| 203788_s_at | 10512  | SEMA3C       | 1.216 |
| 228865_at   | 79098  | C1orf116     | 1.223 |
| 244650_at   |        |              | 1.224 |
| 224856_at   | 2289   | FKBP5        | 1.233 |
| 225575_at   | 3977   | LIFR         | 1.259 |
| 201110_s_at | 7057   | THBS1        | 1.262 |
| 221841_s_at | 9314   | KLF4         | 1.273 |
| 217875_s_at | 56937  | TMEPAI       | 1.276 |
| 230748_at   | 9120   | SLC16A6      | 1.29  |
| 219049_at   | 55790  | ChGn         | 1.295 |
| 222118_at   | 55839  | CENPN        | 1.295 |
| 209706_at   | 4824   | NKX3-1       | 1.296 |
| 220986_s_at | 81789  | TIGD6        | 1.301 |
| 243311_at   | 400830 | RP5-1103G7.6 | 1.301 |
| 222449_at   | 56937  | TMEPAI       | 1.302 |
| 226099_at   | 22936  | ELL2         | 1.307 |
| 219312_s_at | 65986  | ZBTB10       | 1.32  |
| 223805_at   | 114880 | OSBPL6       | 1.334 |
| 224657_at   | 54206  | ERRFI1       | 1.342 |
| 211239_s_at | 8756   | ADAM7        | 1.344 |
| 223168_at   | 58480  | RHOU         | 1.362 |
| 233899_x_at | 65986  | ZBTB10       | 1.374 |
| 232397_at   |        |              | 1.375 |
| 219476_at   | 79098  | C1orf116     | 1.38  |
| 210088_x_at | 4635   | MYL4         | 1.382 |
| 201502_s_at | 4792   | NFKBIA       | 1.399 |
| 227180_at   | 79993  | ELOVL7       | 1.401 |
| 1561454_at  |        |              | 1.416 |
| 228559_at   | 55839  | CENPN        | 1.434 |
| 203789_s_at | 10512  | SEMA3C       | 1.44  |
| 1563456_at  | 285026 | LOC285026    | 1.441 |
| 222267_at   | 84928  | FLJ14803     | 1.442 |
| 204714_s_at | 2153   | F5           | 1.477 |
| 213139_at   | 6591   | SNAI2        | 1.483 |
| 225710_at   | 59345  | GNB4         | 1.486 |
| 224840_at   | 2289   | FKBP5        | 1.52  |
| 223169_s_at | 58480  | RHOU         | 1.642 |

|             |        |         |       |
|-------------|--------|---------|-------|
| 204560_at   | 2289   | FKBP5   | 1.696 |
| 241868_at   |        |         | 1.714 |
| 201739_at   | 6446   | SGK     | 1.775 |
| 235445_at   |        |         | 1.783 |
| 234277_at   |        |         | 1.835 |
| 1553645_at  | 285025 | CCDC141 | 1.836 |
| 223487_x_at | 59345  | GNB4    | 1.842 |
| 209185_s_at | 8660   | IRS2    | 1.909 |
| 225688_s_at | 90102  | PHLDB2  | 1.922 |
| 209348_s_at | 4094   | MAF     | 2.04  |
| 230846_at   |        |         | 2.049 |
| 203914_x_at | 3248   | HPGD    | 2.12  |
| 229327_s_at |        |         | 2.293 |
| 235146_at   |        |         | 2.36  |
| 211548_s_at | 3248   | HPGD    | 2.412 |

LNCaP cells were transfected by nucleofection with either C/EBP $\alpha$  or vector. After 48h, the cells were treated with either R1881(1 nM) or vehicle for 6 h.. Nucleofection resulted in 60% transfection efficiency as determined by co-transfected GFP. The mRNA profile was determined using replicate samples by Affymetrix microarray analysis. The Table lists only genes that were activated by R1881 in 6 h by  $\geq 2$ -fold in the absence of C/EBP $\alpha$ .. The Table shows the effect of ectopic C/EBP $\alpha$  on the fold activation of the corresponding genes; a value of 1 indicates that R1881 stimulation was unaffected by C/EBP $\alpha$ . The values are not adjusted for the transfection efficiency. The *P* values for the fold changes were <0.05.
