# Supplementary material
Source: PubMed Central journal article supplement (PMC3836216)
Supplement: NIHMS527528-supplement-Supp_2.pdf [file NIHMS527528-supplement-Supp_2.pdf]

**Supplementary Table 2: Genes activated by AR in LNCaP cells in a manner dependent on the presence C/EBP $\alpha$ .**

| AffyID      | Entrez Gene | Symbol    | Fold-change | P-value  | Adjusted fold-change |
|-------------|-------------|-----------|-------------|----------|----------------------|
| 207773_x_at | 64816       | CYP3A43   | 2.392       | 2.04E-05 | 3.496                |
| 237515_at   | 148534      | TMEM56    | 2.294       | 7.95E-05 | 3.404                |
| 204259_at   | 4316        | MMP7      | 2.412       | 0.000749 | 3.382                |
| 204595_s_at | 6781        | STC1      | 2.260       | 3.02E-05 | 3.066                |
| 231669_at   | 6414        | SEPP1     | 2.098       | 0.001977 | 2.997                |
| 221581_s_at | 7462        | LAT2      | 2.179       | 0.00889  | 2.990                |
| 201060_x_at | 2040        | STOM      | 2.737       | 0.00016  | 2.989                |
| 226075_at   | 80176       | SPSB1     | 2.055       | 0.003034 | 2.802                |
| 204941_s_at | 222         | ALDH3B2   | 2.079       | 0.002062 | 2.768                |
| 234980_at   | 148534      | TMEM56    | 1.994       | 1.41E-05 | 2.761                |
| 224435_at   | 84293       | C10orf58  | 2.337       | 0.000143 | 2.506                |
| 235004_at   | 221662      | RBM24     | 2.011       | 7.08E-05 | 2.477                |
| 204596_s_at | 6781        | STC1      | 1.838       | 8.73E-05 | 2.459                |
| 209541_at   | 3479        | IGF1      | 2.004       | 2.33E-05 | 2.439                |
| 222360_at   | 51611       | DPH5      | 1.761       | 0.001362 | 2.432                |
| 201299_s_at | 55233       | MOBKL1B   | 1.791       | 0.00349  | 2.419                |
| 205121_at   | 6443        | SGCB      | 1.747       | 0.004392 | 2.388                |
| 205966_at   | 6884        | TAF13     | 1.631       | 0.004991 | 2.246                |
| 224996_at   | NA          | NA        | 1.613       | 0.000364 | 2.223                |
| 1559776_at  | 2760        | GM2A      | 1.699       | 0.000369 | 2.192                |
| 242338_at   | 169200      | TMEM64    | 1.672       | 4.99E-05 | 2.192                |
| 214244_s_at | 8992        | ATP6V0E1  | 1.673       | 0.005579 | 2.176                |
| 208510_s_at | 5468        | PPARG     | 1.777       | 0.000179 | 2.141                |
| 225662_at   | 51776       | ZAK       | 1.597       | 0.001723 | 2.141                |
| 201171_at   | 8992        | ATP6V0E1  | 1.606       | 0.003793 | 2.138                |
| 225335_at   | 84838       | ZNF496    | 1.705       | 0.003466 | 2.132                |
| 227940_at   | 339803      | LOC339803 | 1.755       | 0.001728 | 2.106                |
| 207530_s_at | 1030        | CDKN2B    | 1.741       | 0.004926 | 2.105                |
| 207717_s_at | 5318        | PKP2      | 1.597       | 0.003841 | 2.098                |
| 211220_s_at | 3298        | HSF2      | 1.629       | 0.000718 | 2.097                |
| 242157_at   | 80205       | CHD9      | 1.707       | 0.001913 | 2.094                |
| 219296_at   | 54503       | ZDHHC13   | 1.540       | 0.001438 | 2.079                |
| 202879_s_at | 9267        | CYTH1     | 1.753       | 0.002135 | 2.074                |
| 242034_at   | 64839       | FBXL17    | 1.542       | 0.001098 | 2.069                |
| 205010_at   | 54552       | GNL3L     | 1.611       | 0.000203 | 2.062                |
| 204818_at   | 3294        | HSD17B2   | 1.957       | 0.000772 | 2.060                |
| 221591_s_at | 54478       | FAM64A    | 1.523       | 0.00247  | 2.047                |
| 243405_at   | NA          | NA        | 1.537       | 0.001579 | 2.040                |
| 207611_at   | 8340        | HIST1H2BL | 1.551       | 0.001225 | 2.039                |
| 225665_at   | 51776       | ZAK       | 1.542       | 0.000302 | 2.036                |
| 226283_at   | 282809      | WDR51B    | 1.536       | 0.004026 | 2.019                |
| 205016_at   | 7039        | TGFA      | 1.617       | 0.003131 | 2.017                |
| 200729_s_at | 10097       | ACTR2     | 1.528       | 0.002292 | 2.016                |
| 224394_at   | 9616        | RNF7      | 1.814       | 0.001528 | 2.013                |
| 223292_s_at | 64960       | MRPS15    | 1.533       | 0.000649 | 2.007                |

|              |        |           |       |          |       |
|--------------|--------|-----------|-------|----------|-------|
| 34408_at     | 6253   | RTN2      | 1.530 | 0.007459 | 1.999 |
| 201404_x_at  | 5690   | PSMB2     | 1.506 | 0.002227 | 1.999 |
| 211018_at    | 4047   | LSS       | 1.719 | 0.000913 | 1.997 |
| 205217_at    | 1678   | TIMM8A    | 1.497 | 0.000303 | 1.963 |
| 241989_at    | 2868   | GRK4      | 1.482 | 0.00168  | 1.960 |
| 211441_x_at  | 64816  | CYP3A43   | 1.610 | 0.002653 | 1.956 |
| 205479_s_at  | 5328   | PLAU      | 1.685 | 0.0075   | 1.953 |
| 239126_at    | 148046 | C19orf23  | 1.705 | 0.009429 | 1.938 |
| 235404_at    | 84159  | ARID5B    | 1.492 | 0.000473 | 1.934 |
| 211363_s_at  | 4507   | MTAP      | 1.667 | 0.002611 | 1.929 |
| 214590_s_at  | 7321   | UBE2D1    | 1.622 | 0.001228 | 1.923 |
| 201169_s_at  | 8553   | BHLHB2    | 1.477 | 0.003792 | 1.921 |
| 216609_at    | 7295   | TXN       | 1.539 | 0.009522 | 1.917 |
| 211804_s_at  | 1017   | CDK2      | 1.502 | 0.00887  | 1.916 |
| 217762_s_at  | 11031  | RAB31     | 1.668 | 0.00222  | 1.913 |
| 1556316_s_at | 284889 | LOC284889 | 1.461 | 0.007485 | 1.908 |
| 210896_s_at  | 444    | ASPH      | 1.520 | 0.000857 | 1.905 |
| 235907_at    | 55161  | TMEM33    | 1.447 | 0.004131 | 1.896 |
| 205850_s_at  | 2562   | GABRB3    | 1.521 | 0.000865 | 1.894 |
| 224753_at    | 113130 | CDCA5     | 1.482 | 0.008678 | 1.893 |
| 211089_s_at  | 4752   | NEK3      | 1.535 | 0.008743 | 1.888 |
| 208591_s_at  | 5140   | PDE3B     | 1.556 | 0.001062 | 1.884 |
| 209135_at    | 444    | ASPH      | 1.509 | 0.00089  | 1.881 |
| 210098_s_at  | NA     | NA        | 1.542 | 0.004074 | 1.881 |
| 224441_s_at  | 85015  | USP45     | 1.541 | 0.004197 | 1.877 |
| 238448_at    | 9801   | MRPL19    | 1.640 | 0.002012 | 1.872 |
| 238562_at    | 84294  | UTP23     | 1.524 | 0.009152 | 1.868 |
| 239007_at    | 90317  | ZNF616    | 1.560 | 0.000732 | 1.866 |
| 225974_at    | 169200 | TMEM64    | 1.484 | 0.000249 | 1.865 |
| 206685_at    | 54435  | HCG4      | 1.496 | 0.006566 | 1.864 |
| 1554047_at   | 10190  | TXNDC9    | 1.428 | 0.003665 | 1.862 |
| 214681_at    | 2710   | GK        | 1.459 | 0.000756 | 1.862 |
| 227609_at    | 94240  | EPSTI1    | 1.473 | 0.005483 | 1.861 |
| 217785_s_at  | 10652  | YKT6      | 1.433 | 0.003486 | 1.859 |
| 243027_at    | 150084 | IGSF5     | 1.461 | 0.003822 | 1.858 |
| 207425_s_at  | 10801  | SEP9      | 1.434 | 0.002196 | 1.854 |
| 201212_at    | 5641   | LGMN      | 1.519 | 0.000242 | 1.851 |
| 202145_at    | 4061   | LY6E      | 1.471 | 0.002489 | 1.851 |
| 227130_s_at  | 7088   | TLE1      | 1.640 | 0.001074 | 1.851 |
| 210334_x_at  | 332    | BIRC5     | 1.488 | 0.008843 | 1.850 |
| 207099_s_at  | 1121   | CHM       | 1.626 | 0.001916 | 1.848 |
| 209167_at    | 2824   | GPM6B     | 1.440 | 0.002915 | 1.838 |
| 225114_at    | 8540   | AGPS      | 1.432 | 0.001354 | 1.837 |
| 226066_at    | 4286   | MITF      | 1.506 | 0.000205 | 1.837 |
| 1553150_at   | 221656 | AOF1      | 1.515 | 0.001011 | 1.834 |
| 231719_at    | 64163  | IFRG15    | 1.457 | 0.006614 | 1.832 |
| 217612_at    | 92609  | TIMM50    | 1.550 | 0.003696 | 1.828 |
| 1552573_s_at | 145282 | MIPOL1    | 1.603 | 0.003618 | 1.825 |
| 205848_at    | 2620   | GAS2      | 1.457 | 0.005718 | 1.823 |
| 223735_at    | 84100  | ARL6      | 1.636 | 0.00037  | 1.823 |

|             |       |        |       |          |       |
|-------------|-------|--------|-------|----------|-------|
| 209457_at   | 1847  | DUSP5  | 1.432 | 0.009318 | 1.822 |
| 204225_at   | 9759  | HDAC4  | 1.456 | 0.008512 | 1.822 |
| 222558_at   | 55197 | RPRD1A | 1.631 | 0.002067 | 1.820 |
| 1555279_at  | 25852 | ARMC8  | 1.436 | 0.006498 | 1.820 |
| 203626_s_at | 6502  | SKP2   | 1.413 | 0.002388 | 1.817 |

LNCaP cells were transfected by nucleofection with C/EBP $\alpha$  or vector. After 24h, the cells were infected with AR shRNA lentivirus or non-target control lentivirus; the cells were then grown in fresh hormone-free media. The cells were then treated for 48 h with either vehicle or R1881 (1 nM). The cells were harvested 72 h post nucleofection and the mRNA profile was determined using replicate samples by Affymetrix microarray analysis. The AR knockdown accomplished by infection with shRNA lentivirus was 100% (please see Figure 5B in the manuscript). 50% of the cells were transfected by nucleofection with the C/EBP $\alpha$  expression plasmid, as determined by co-transfected GFP. The Table only includes genes that were unresponsive to R1881/AR. The Table shows the fold increase in gene expression which was dependent on the presence of both AR and C/EBP $\alpha$ . Significant increases in expression in AR<sup>+</sup> C/EBP $\alpha$ <sup>+</sup> R1881-treated cells compared to AR<sup>-</sup> C/EBP $\alpha$ <sup>+</sup> vehicle-treated cells were determined using the affyImGUI program. The fold-changes and *P*-values for these increases were determined by the affyImGUI program. An adjusted fold-change was also calculated to compensate for the fact that only 50% of the cells were transfected by the C/EBP $\alpha$  expression plasmid. The list was filtered to remove all probe sets with activation by (AR + R1881)/AR<sup>-</sup>control >1.2, those with average expression levels <64, and those with *P*-values for increase >0.01. The adjusted increases for the 100 genes with the greatest increases are shown in this Table.
