# Supplementary material
Source: PubMed Central journal article supplement (PMC3836216)
Supplement: NIHMS527528-supplement-Supp_3.pdf [file NIHMS527528-supplement-Supp_3.pdf]

**Supplement 3: Chromosomal sites of C/EBP $\alpha$ -dependent AR recruitment in LNCaP cells.**

| CHROMOSOME | PEAK_START | PEAK_END | PEAK_SCORE | PEAK_FDR |
|------------|------------|----------|------------|----------|
| chr14      | 52601046   | 52601205 | 1.17       | 0.00E+00 |
| chr2       | 1.06E+08   | 1.06E+08 | 1.04       | 2.83E-02 |
| chr12      | 1.22E+08   | 1.22E+08 | 0.99       | 0.00E+00 |
| chr12      | 44497748   | 44498402 | 0.96       | 0.00E+00 |
| chr10      | 1.15E+08   | 1.15E+08 | 0.95       | 0.00E+00 |
| chr4       | 71491589   | 71491943 | 0.92       | 1.72E-03 |
| chr18      | 12536855   | 12537508 | 0.92       | 2.90E-03 |
| chr8       | 38150762   | 38151115 | 0.9        | 3.99E-04 |
| chr4       | 48351835   | 48352195 | 0.9        | 3.10E-03 |
| chr4       | 75392767   | 75393121 | 0.87       | 4.21E-03 |
| chr2       | 63521540   | 63521989 | 0.85       | 3.10E-03 |
| chr11      | 5177756    | 5178012  | 0.84       | 1.46E-02 |
| chr14      | 19284356   | 19284711 | 0.83       | 4.02E-03 |
| chr3       | 98641259   | 98641713 | 0.82       | 4.21E-03 |
| chr2       | 1.57E+08   | 1.57E+08 | 0.82       | 4.21E-03 |
| chr17      | 64652066   | 64652422 | 0.82       | 4.78E-03 |
| chr12      | 8959815    | 8960174  | 0.82       | 5.62E-03 |
| chr11      | 1.02E+08   | 1.02E+08 | 0.81       | 5.62E-03 |
| chr3       | 1.32E+08   | 1.32E+08 | 0.79       | 5.96E-03 |
| chr3       | 1.43E+08   | 1.43E+08 | 0.79       | 2.38E-02 |
| chr3       | 1.5E+08    | 1.5E+08  | 0.79       | 2.38E-02 |
| chr4       | 1.15E+08   | 1.15E+08 | 0.78       | 1.17E-02 |
| chr11      | 59917285   | 59917534 | 0.78       | 2.19E-02 |
| chr6       | 1.22E+08   | 1.22E+08 | 0.78       | 2.70E-02 |
| chr17      | 53852984   | 53853345 | 0.77       | 4.02E-03 |
| chr10      | 63699722   | 63700482 | 0.76       | 1.17E-03 |
| chr9       | 21219764   | 21220118 | 0.76       | 8.45E-03 |
| chr8       | 81574333   | 81574990 | 0.76       | 8.45E-03 |
| chr6       | 49941427   | 49941682 | 0.75       | 2.87E-02 |
| chr21      | 37714424   | 37714981 | 0.74       | 8.14E-03 |
| chr1       | 2.42E+08   | 2.42E+08 | 0.73       | 4.18E-03 |
| chr9       | 13243342   | 13243796 | 0.73       | 1.17E-02 |
| chr1       | 1.12E+08   | 1.12E+08 | 0.73       | 1.17E-02 |
| chr1       | 1.15E+08   | 1.15E+08 | 0.73       | 1.17E-02 |
| chr11      | 58033004   | 58033560 | 0.73       | 1.37E-02 |
| chr8       | 94783170   | 94783419 | 0.73       | 2.87E-02 |
| chr10      | 1.16E+08   | 1.16E+08 | 0.73       | 3.36E-02 |
| chr14      | 98997272   | 98997829 | 0.72       | 1.37E-02 |
| chr5       | 95091498   | 95092057 | 0.72       | 1.48E-02 |
| chr6       | 1.28E+08   | 1.28E+08 | 0.72       | 3.28E-02 |
| chr8       | 53786189   | 53786644 | 0.71       | 1.48E-02 |
| chr3       | 88193695   | 88194155 | 0.71       | 1.48E-02 |
| chr2       | 2.02E+08   | 2.02E+08 | 0.71       | 1.48E-02 |
| chr12      | 4627032    | 4627382  | 0.71       | 1.99E-02 |
| chr10      | 27023400   | 27023756 | 0.71       | 2.14E-02 |
| chr19      | 9189663    | 9189921  | 0.71       | 2.19E-02 |

|       |          |          |      |          |
|-------|----------|----------|------|----------|
| chr1  | 93029799 | 93030552 | 0.7  | 5.13E-03 |
| chr1  | 2.15E+08 | 2.15E+08 | 0.7  | 1.48E-02 |
| chr11 | 59238745 | 59239199 | 0.7  | 1.99E-02 |
| chr6  | 1.13E+08 | 1.13E+08 | 0.7  | 2.14E-02 |
| chr6  | 1.47E+08 | 1.47E+08 | 0.7  | 2.14E-02 |
| chrX  | 1.03E+08 | 1.03E+08 | 0.7  | 2.48E-02 |
| chr11 | 1.02E+08 | 1.02E+08 | 0.7  | 4.44E-02 |
| chr18 | 12442365 | 12442721 | 0.69 | 2.48E-02 |
| chr12 | 1.15E+08 | 1.15E+08 | 0.68 | 3.63E-03 |
| chr16 | 33867894 | 33868450 | 0.68 | 8.14E-03 |
| chr21 | 30666452 | 30667001 | 0.68 | 1.99E-02 |
| chr21 | 30775357 | 30775806 | 0.68 | 1.99E-02 |
| chr8  | 1.21E+08 | 1.21E+08 | 0.68 | 2.14E-02 |
| chr9  | 1.25E+08 | 1.25E+08 | 0.68 | 2.14E-02 |
| chr3  | 1.44E+08 | 1.44E+08 | 0.68 | 2.14E-02 |
| chr12 | 91338665 | 91339118 | 0.68 | 2.48E-02 |
| chr3  | 69253657 | 69253906 | 0.68 | 3.86E-02 |
| chr2  | 1.72E+08 | 1.72E+08 | 0.68 | 3.86E-02 |
| chr20 | 10144576 | 10145128 | 0.67 | 2.82E-03 |
| chr1  | 1.58E+08 | 1.58E+08 | 0.67 | 2.14E-02 |
| chr1  | 2.35E+08 | 2.35E+08 | 0.67 | 2.14E-02 |
| chr11 | 85688035 | 85688498 | 0.67 | 2.48E-02 |
| chr6  | 1.19E+08 | 1.19E+08 | 0.67 | 2.84E-02 |
| chr5  | 1.48E+08 | 1.48E+08 | 0.67 | 2.84E-02 |
| chr13 | 27645719 | 27646175 | 0.67 | 3.35E-02 |
| chr3  | 88268251 | 88268610 | 0.66 | 2.84E-02 |
| chr3  | 1.1E+08  | 1.1E+08  | 0.66 | 2.84E-02 |
| chr3  | 1.47E+08 | 1.47E+08 | 0.66 | 2.84E-02 |
| chr4  | 77121509 | 77122158 | 0.66 | 3.57E-02 |
| chr4  | 1.29E+08 | 1.29E+08 | 0.66 | 3.57E-02 |
| chr4  | 1.66E+08 | 1.66E+08 | 0.66 | 3.57E-02 |
| chr1  | 1.96E+08 | 1.96E+08 | 0.65 | 1.08E-02 |
| chr1  | 92313157 | 92313606 | 0.65 | 2.84E-02 |
| chr1  | 1.58E+08 | 1.58E+08 | 0.65 | 2.84E-02 |
| chr1  | 1.76E+08 | 1.76E+08 | 0.65 | 2.84E-02 |
| chr12 | 8956115  | 8956473  | 0.65 | 3.35E-02 |
| chr15 | 97613278 | 97614137 | 0.65 | 3.35E-02 |
| chr8  | 41918701 | 41918956 | 0.65 | 5.00E-02 |
| chr1  | 1.85E+08 | 1.85E+08 | 0.65 | 5.00E-02 |
| chr17 | 26185761 | 26186211 | 0.64 | 1.99E-02 |
| chr17 | 26647626 | 26648187 | 0.64 | 1.99E-02 |
| chr17 | 64649860 | 64650323 | 0.64 | 1.99E-02 |
| chr13 | 51933217 | 51933871 | 0.64 | 2.32E-02 |
| chrX  | 1.01E+08 | 1.01E+08 | 0.64 | 2.32E-02 |
| chr7  | 88264917 | 88265476 | 0.64 | 2.84E-02 |
| chr7  | 1.56E+08 | 1.56E+08 | 0.64 | 2.84E-02 |
| chr10 | 1.04E+08 | 1.04E+08 | 0.64 | 3.35E-02 |
| chr5  | 69624826 | 69625179 | 0.64 | 3.57E-02 |
| chr6  | 1.19E+08 | 1.19E+08 | 0.64 | 3.57E-02 |
| chr6  | 1.39E+08 | 1.39E+08 | 0.64 | 3.57E-02 |

|       |          |          |      |          |
|-------|----------|----------|------|----------|
| chr4  | 68511303 | 68511752 | 0.64 | 4.54E-02 |
| chr4  | 1.11E+08 | 1.11E+08 | 0.64 | 4.54E-02 |
| chr4  | 1.57E+08 | 1.57E+08 | 0.64 | 4.54E-02 |
| chrX  | 16597366 | 16597815 | 0.64 | 4.65E-02 |
| chr13 | 49362869 | 49363225 | 0.64 | 4.65E-02 |
| chr2  | 18634759 | 18635519 | 0.63 | 1.92E-02 |
| chr2  | 33668969 | 33669727 | 0.63 | 1.92E-02 |
| chr2  | 33512319 | 33512671 | 0.63 | 3.57E-02 |
| chr3  | 79721301 | 79721760 | 0.63 | 3.57E-02 |
| chr2  | 80394015 | 80394664 | 0.63 | 3.57E-02 |
| chr3  | 99732541 | 99733092 | 0.63 | 3.57E-02 |
| chr3  | 1.09E+08 | 1.09E+08 | 0.63 | 3.57E-02 |
| chr3  | 1.59E+08 | 1.59E+08 | 0.63 | 3.57E-02 |
| chr2  | 1.92E+08 | 1.92E+08 | 0.63 | 3.57E-02 |
| chr18 | 7743870  | 7744430  | 0.63 | 4.65E-02 |
| chr8  | 58036974 | 58038334 | 0.62 | 0.00E+00 |
| chr10 | 1.04E+08 | 1.04E+08 | 0.62 | 5.01E-03 |
| chr8  | 173196   | 173747   | 0.62 | 3.57E-02 |
| chr1  | 45695608 | 45695957 | 0.62 | 3.57E-02 |
| chr9  | 74053456 | 74054115 | 0.62 | 3.57E-02 |
| chr7  | 99646563 | 99647012 | 0.62 | 3.57E-02 |
| chr1  | 1.73E+08 | 1.73E+08 | 0.62 | 3.57E-02 |
| chr11 | 46522205 | 46522763 | 0.62 | 4.65E-02 |
| chr15 | 91243248 | 91243805 | 0.62 | 4.65E-02 |
| chr4  | 86038556 | 86039508 | 0.61 | 6.58E-03 |
| chr16 | 18722733 | 18723291 | 0.61 | 2.48E-02 |
| chr19 | 19995836 | 19996185 | 0.61 | 2.48E-02 |
| chr19 | 22155973 | 22156327 | 0.61 | 2.48E-02 |
| chr16 | 66312068 | 66312517 | 0.61 | 2.48E-02 |
| chr22 | 29687623 | 29687879 | 0.61 | 4.44E-02 |
| chr6  | 50893571 | 50894027 | 0.61 | 4.54E-02 |
| chr6  | 96569389 | 96569838 | 0.61 | 4.54E-02 |
| chr14 | 20566596 | 20567054 | 0.61 | 4.65E-02 |
| chr9  | 21789934 | 21790389 | 0.6  | 4.54E-02 |
| chr8  | 27946639 | 27947199 | 0.6  | 4.54E-02 |
| chr3  | 52276544 | 52277198 | 0.6  | 4.54E-02 |
| chr9  | 74055056 | 74055512 | 0.6  | 4.54E-02 |
| chr9  | 1.02E+08 | 1.02E+08 | 0.6  | 4.54E-02 |
| chr3  | 1.34E+08 | 1.34E+08 | 0.6  | 4.54E-02 |
| chr2  | 1.83E+08 | 1.83E+08 | 0.6  | 4.54E-02 |
| chr1  | 1.85E+08 | 1.85E+08 | 0.59 | 1.14E-02 |
| chr7  | 1.48E+08 | 1.48E+08 | 0.59 | 2.27E-02 |
| chr22 | 31182623 | 31183080 | 0.59 | 2.48E-02 |
| chr10 | 1.21E+08 | 1.21E+08 | 0.59 | 3.02E-02 |
| chr17 | 11440572 | 11441029 | 0.59 | 3.35E-02 |
| chr20 | 11844595 | 11845157 | 0.59 | 3.35E-02 |
| chr20 | 56682807 | 56683259 | 0.59 | 3.35E-02 |
| chr17 | 63966722 | 63967377 | 0.59 | 3.35E-02 |
| chr1  | 1.13E+08 | 1.13E+08 | 0.59 | 4.54E-02 |
| chr1  | 1.72E+08 | 1.72E+08 | 0.59 | 4.54E-02 |

|       |          |          |      |          |
|-------|----------|----------|------|----------|
| chr1  | 2.38E+08 | 2.38E+08 | 0.59 | 4.54E-02 |
| chr14 | 19281926 | 19282884 | 0.58 | 3.02E-02 |
| chr6  | 1.28E+08 | 1.28E+08 | 0.58 | 3.36E-02 |
| chr4  | 23503338 | 23504091 | 0.58 | 4.53E-02 |
| chr2  | 1.79E+08 | 1.79E+08 | 0.57 | 3.36E-02 |
| chr1  | 2.08E+08 | 2.08E+08 | 0.57 | 3.36E-02 |
| chr12 | 14857833 | 14858790 | 0.57 | 4.08E-02 |
| chr14 | 90997365 | 90998024 | 0.56 | 4.08E-02 |
| chr16 | 24456308 | 24456862 | 0.56 | 4.65E-02 |
| chr19 | 57924697 | 57925155 | 0.56 | 4.65E-02 |
| chr16 | 78195205 | 78195565 | 0.56 | 4.65E-02 |
| chr18 | 23021127 | 23022276 | 0.55 | 1.78E-02 |
| chr2  | 1.52E+08 | 1.52E+08 | 0.55 | 4.53E-02 |
| chr7  | 24900069 | 24901118 | 0.54 | 4.53E-02 |
| chr7  | 92697171 | 92698024 | 0.54 | 4.53E-02 |
| chr3  | 18456458 | 18457613 | 0.52 | 2.70E-02 |
| chr3  | 62837744 | 62838702 | 0.52 | 2.70E-02 |
| chr7  | 1.12E+08 | 1.12E+08 | 0.51 | 0.00E+00 |
| chr2  | 70376428 | 70377577 | 0.49 | 1.86E-02 |
| chr1  | 1.51E+08 | 1.51E+08 | 0.46 | 8.77E-03 |
| chr20 | 32159090 | 32160344 | 0.44 | 2.07E-02 |
| chr17 | 31441341 | 31442197 | 0.43 | 3.69E-02 |
| chr19 | 57996201 | 57997262 | 0.43 | 3.69E-02 |

LNCaP cells were nucleofected with either C/EBP $\alpha$  or the corresponding empty vector for 48 h; then the cells were treated for 2 h with either R1881 (1nM) or vehicle and the samples were subjected to ChIP-chip analysis using anti-AR antibody as described under Methods. The Table lists chromatin sites at which AR recruitment was dependent on the presence of C/EBP $\alpha$ . Only peaks with FDR<0.05 are included in this Table.
